# Supplementary material
Source: bioRxiv or medRxiv preprint supplement (https://www.biorxiv.org/highwire/filestream/8229/field_highwire_adjunct_files/2/030619-3.pdf)

*Bacillus subtilis* subsp. *subtilis* str. 168 :

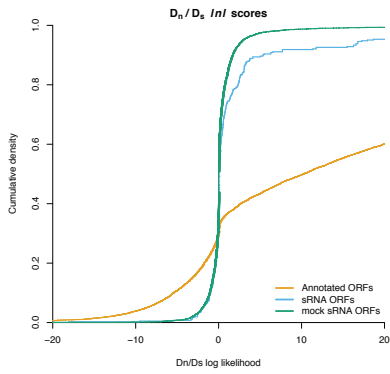

*Clostridium acetobutylicum* ATCC 824 :

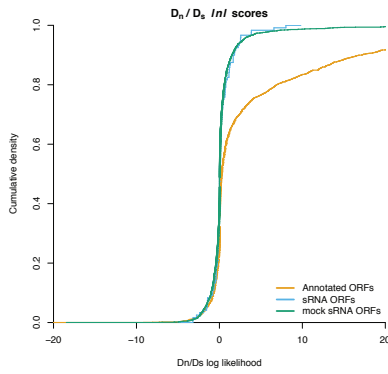

*Escherichia coli* str. K-12 substr. MG1655 :

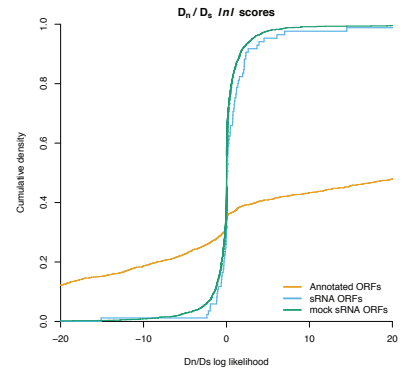

*Helicobacter pylori* 26695 :

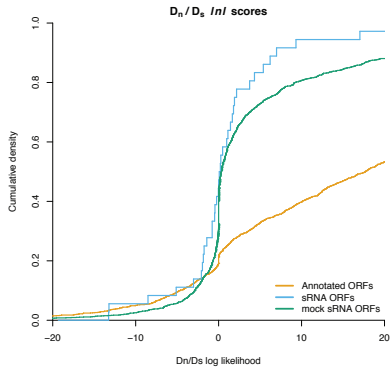

*Listeria monocytogenes* EGD-e :

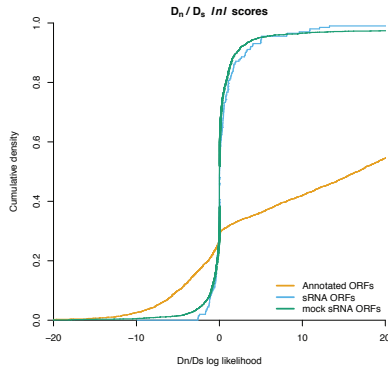

*Legionella pneumophila* subsp. *pneumophila* str. Philadelphia 1 :

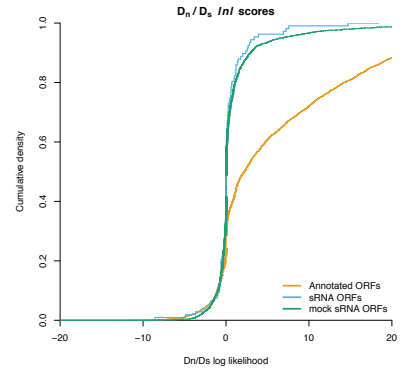

*Staphylococcus aureus* subsp. *aureus* N315 :

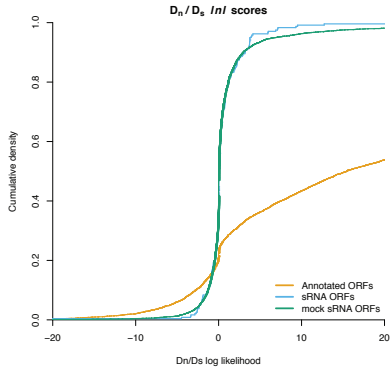

*Staphylococcus aureus* subsp. *aureus* NCTC 8325 :

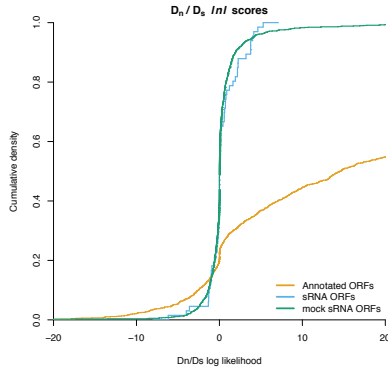

*Streptomyces coelicolor* A3(2) :

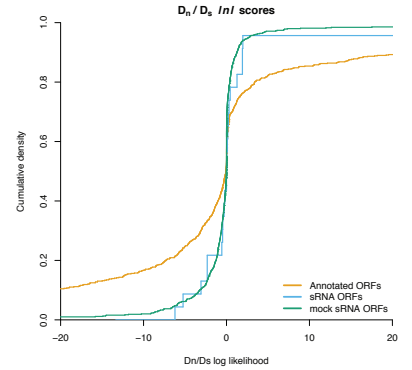

*Sinorhizobium meliloti* 1021 :

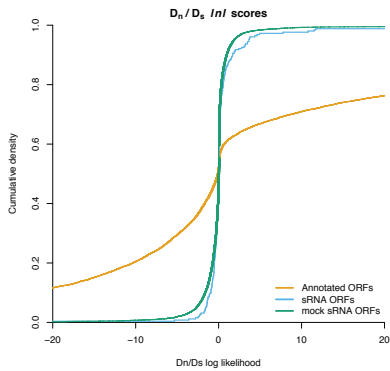

*Streptococcus pneumoniae* TIGR4 :

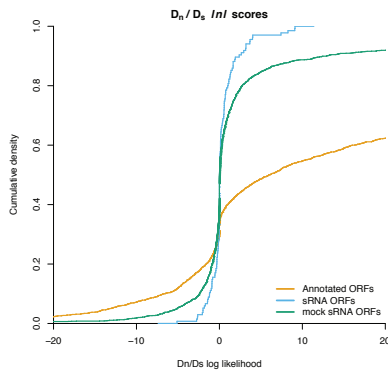

*Streptococcus pyogenes* MGAS5005 :

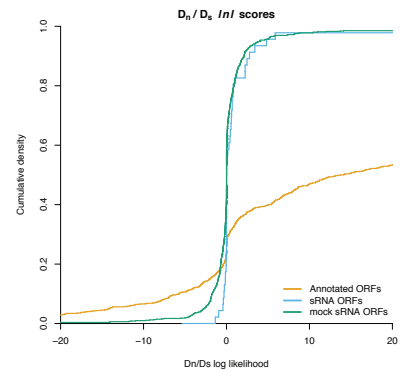

*Salmonella enterica* subsp. *enterica* serovar Typhimurium str. SL1344 :

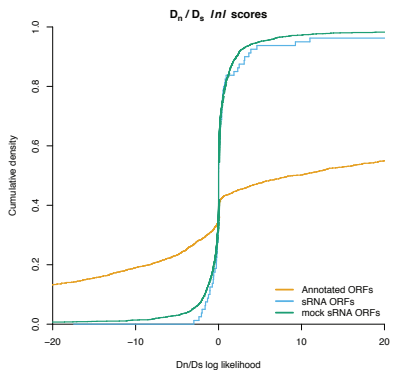

*Synechocystis* sp. PCC 6803 :

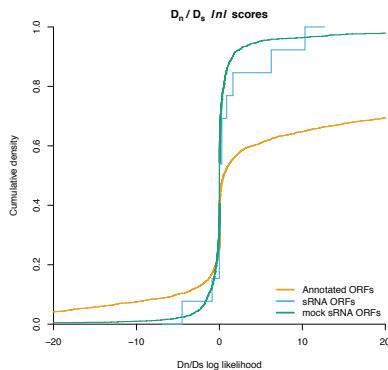

Supplement: Supplementary file [file 030619-3.pdf]
